# Supplementary material for: Generation of Ag–Ag2O complex nanostructures by excimer laser ablation of Ag in water
Source: Royal Society of Chemistry journal article supplement (doi:10.1039/c2cp42668d), 2012-10-08
Supplement: c2cp42668d.pdf [file c2cp42668d.pdf]

## Supplementary Information

# Generation of Ag/Ag<sub>2</sub>O complex nanostructures by excimer laser ablation of Ag in water

Zijie Yan,\* Ruqiang Bao, and Douglas B. Chrisey\*

Department of Materials Science and Engineering, Rensselaer Polytechnic Institute, Troy, New York 12180, USA

E-mail: [zijieyan@uchicago.edu](mailto:zijieyan@uchicago.edu), [chrisd@rpi.edu](mailto:chrisd@rpi.edu).

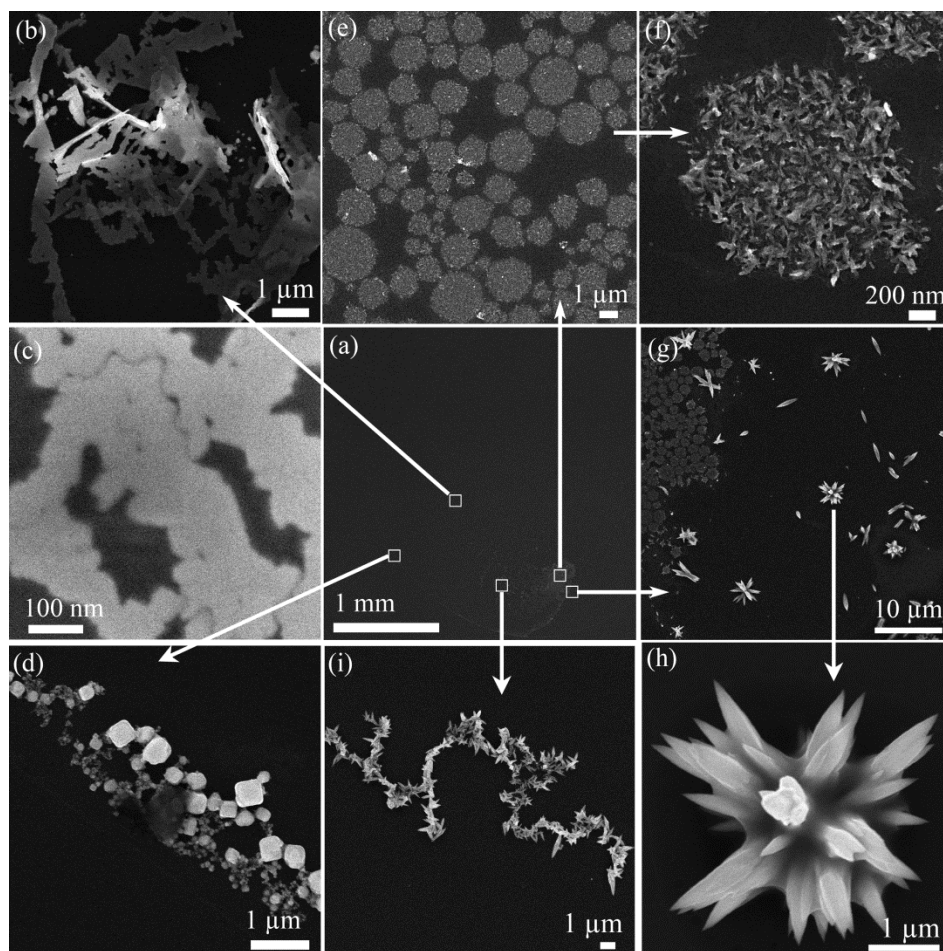

**Figure S1.** SEM images of deposits formed by drop evaporation of Ag colloids on p-type Si substrate: (a) a general view of the deposits, (b) and (c) nanosheets, (d) cubes and irregular

particles in the outmost evaporation ring of the deposits, (e) and (f) disk-like structures in the central area, (g) and (h) flower-like structures, and (i) a chain of flower-like structures.

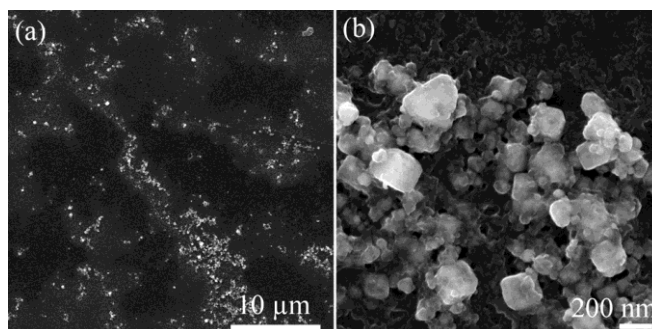

**Figure S2.** SEM images of (a) deposits formed by drop evaporation of Ag colloids on a glass coverslip, and (b) irregular particles with higher magnification.

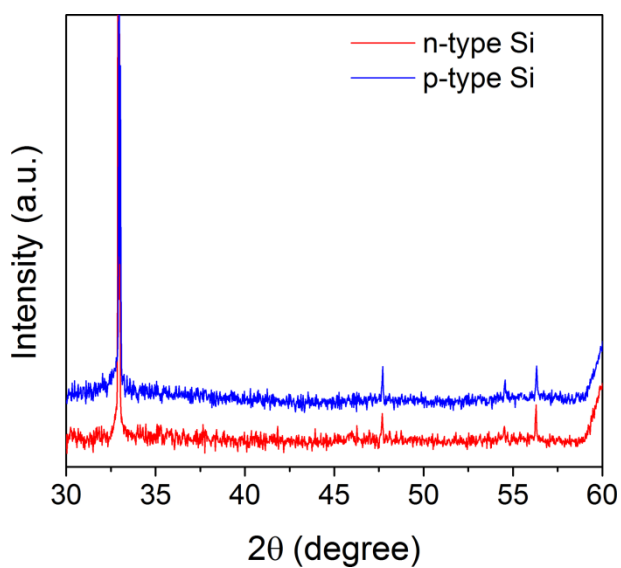

**Figure S3.** XRD patterns of the bare Si substrates.
